# Supplementary material for: Computational Identification of Taxus baccata-Derived Phytochemicals Targeting EZH2 to Overcome Therapeutic Resistance in Melanoma
Source: Research Square preprint supplement (doi:10.21203/rs.3.rs-8494315/v1), 2026-01-22
Supplement: Supplementary file 1 [file a12aa402574f90ba99b1f3e1.docx]

**­­­­Computational Identification of *Taxus baccata*-Derived Phytochemicals Targeting EZH2 to Overcome Therapeutic Resistance in Melanoma**

| **Supplementary Table 1:**  General information of the ligand library | | | | | | |
| --- | --- | --- | --- | --- | --- | --- |
| **Serial** | **Name** | **IUPAC Name** | **Plant part** | **CID** | **SMILES** |
| 1 | beta-Sitosterol | (3S,8S,9S,10R,13R,14S,17R)-17-[(2R,5R)-5-ethyl-6-methylheptan-2-yl]-10,13-dimethyl-2,3,4,7,8,9,11,12,14,15,16,17-dodecahydro-1H-cyclopenta[a]phenanthren-3-ol | bark | 222284 | CC[C@H](CC[C@@H](C)[C@H]1CC[C@@H]2[C@@]1(CC[C@H]3[C@H]2CC=C4[C@@]3(CC[C@@H](C4)O)C)C)C(C)C |
| 2 | Eschscholtzxanthone | (4Z)-4-[(2E,4E,6E,8E,10E,12E,14E,16E,18Z)-18-[(4S)-4-hydroxy-2,6,6-trimethylcyclohex-2-en-1-ylidene]-3,7,12,16-tetramethyloctadeca-2,4,6,8,10,12,14,16-octaenylidene]-3,5,5-trimethylcyclohex-2-en-1-one | fruit | 16061205 | CC\1=C[C@H](CC(/C1=C/C=C(\C)/C=C/C=C(\C)/C=C/C=C/C(=C/C=C/C(=C/C=C/2\C(=CC(=O)CC2(C)C)C)/C)/C)(C)C)O |
| 3 | Rhodoxanthin | (4E)-3,5,5-trimethyl-4-[(2E,4E,6E,8E,10E,12E,14E,16E,18E)-3,7,12,16-tetramethyl-18-(2,6,6-trimethyl-4-oxocyclohex-2-en-1-ylidene)octadeca-2,4,6,8,10,12,14,16-octaenylidene]cyclohex-2-en-1-one | fruit | 5281251 | CC\1=CC(=O)CC(/C1=C\C=C(\C=C\C=C(\C=C\C=C\C(=C\C=C\C(=C\C=C\2/C(CC(=O)C=C2C)(C)C)\C)\C)/C)/C)(C)C |
| 4 | beta-Carotene | 1,3,3-trimethyl-2-[(1E,3E,5E,7E,9E,11E,13E,15E,17E)-3,7,12,16-tetramethyl-18-(2,6,6-trimethylcyclohexen-1-yl)octadeca-1,3,5,7,9,11,13,15,17-nonaenyl]cyclohexene | fruit | 5280489 | CC1=C(C(CCC1)(C)C)/C=C/C(=C/C=C/C(=C/C=C/C=C(/C=C/C=C(/C=C/C2=C(CCCC2(C)C)C)\C)\C)/C)/C |
| 5 | Zeaxanthin | (1R)-4-[(1E,3E,5E,7E,9E,11E,13E,15E,17E)-18-[(4R)-4-hydroxy-2,6,6-trimethylcyclohexen-1-yl]-3,7,12,16-tetramethyloctadeca-1,3,5,7,9,11,13,15,17-nonaenyl]-3,5,5-trimethylcyclohex-3-en-1-ol | fruit | 5280899 | CC1=C(C(C[C@@H](C1)O)(C)C)/C=C/C(=C/C=C/C(=C/C=C/C=C(/C=C/C=C(/C=C/C2=C(C[C@H](CC2(C)C)O)C)\C)\C)/C)/C |
| 6 | Myristic acid | tetradecanoic acid | leaf | 11005 | CCCCCCCCCCCCCC(=O)O |
| 7 | Myrtenol | (6,6-dimethyl-2-bicyclo[3.1.1]hept-2-enyl)methanol | leaf | 10582 | CC1(C2CC=C(C1C2)CO)C |
| 8 | Isophytol | 3,7,11,15-tetramethylhexadec-1-en-3-ol | leaf | 10453 | CC(C)CCCC(C)CCCC(C)CCCC(C)(C=C)O |
| 9 | Taxinine | [(1R,2R,3R,5S,8R,9R,10R)-2,9,10-triacetyloxy-8,12,15,15-tetramethyl-4-methylidene-13-oxo-5-tricyclo[9.3.1.03,8]pentadec-11-enyl] (E)-3-phenylprop-2-enoate | leaf | 10054413 | CC1=C2[C@H]([C@@H]([C@@]3(CC[C@@H](C(=C)[C@H]3[C@@H]([C@@H](C2(C)C)CC1=O)OC(=O)C)OC(=O)/C=C/C4=CC=CC=C4)C)OC(=O)C)OC(=O)C |
| 10 | Syringic acid | 4-hydroxy-3,5-dimethoxybenzoic acid | leaf | 10742 | COC1=CC(=CC(=C1O)OC)C(=O)O |
| 11 | Ferruginol | (4bS,8aS)-4b,8,8-trimethyl-2-propan-2-yl-5,6,7,8a,9,10-hexahydrophenanthren-3-ol | leaf | 442027 | CC(C)C1=C(C=C2C(=C1)CC[C@@H]3[C@@]2(CCCC3(C)C)C)O |
| 12 | 6,10,14-Trimethylpentadecan-2-one | 6,10,14-Trimethylpentadecan-2-one | leaf | 10408 | CC(C)CCCC(C)CCCC(C)CCCC(=O)C |
| 13 | Teixidol | [(2S,4R,5R,5aR,8S,9aR,10S,10aR)-4,5,10-triacetyloxy-8-hydroxy-10a-(2-hydroxypropan-2-yl)-3,5a-dimethyl-9-methylidene-2,4,5,6,7,8,9a,10-octahydro-1H-benzo[f]azulen-2-yl] acetate | leaf | 101997932 | CC1=C2[C@H]([C@@H]([C@@]3(CC[C@@H](C(=C)[C@H]3[C@@H]([C@]2(C[C@@H]1OC(=O)C)C(C)(C)O)OC(=O)C)O)C)OC(=O)C)OC(=O)C |
| 14 | 10-Deacetylbaccatin III | [(1S,2S,3R,4S,7R,9S,10S,12R,15S)-4-acetyloxy-1,9,12,15-tetrahydroxy-10,14,17,17-tetramethyl-11-oxo-6-oxatetracyclo[11.3.1.03,10.04,7]heptadec-13-en-2-yl] benzoate | leaf | 154272 | CC1=C2[C@H](C(=O)[C@@]3([C@H](C[C@@H]4[C@]([C@H]3[C@@H]([C@@](C2(C)C)(C[C@@H]1O)O)OC(=O)C5=CC=CC=C5)(CO4)OC(=O)C)O)C)O |
| 15 | Octadecane | Octadecane | leaf | 11635 | CCCCCCCCCCCCCCCCCC |
| 16 | Lignan | ethyl 6,7-dimethoxy-3-methyl-4-oxo-1-(3,4,5-trimethoxyphenyl)-2,3-dihydro-1H-naphthalene-2-carboxylate | leaf | 261166 | CCOC(=O)C1C(C(=O)C2=CC(=C(C=C2C1C3=CC(=C(C(=C3)OC)OC)OC)OC)OC)C |
| 17 | Benzoic acid | Benzoic acid | leaf | 243 | C1=CC=C(C=C1)C(=O)O |
| 18 | 2,5-Dihydroxybenzoic acid | 2,5-Dihydroxybenzoic acid | leaf | 3469 | C1=CC(=C(C=C1O)C(=O)O)O |
| 19 | Pentadecanal | Pentadecanal | leaf | 17697 | CCCCCCCCCCCCCCC=O |
| 20 | 2-Methoxy-4-vinylphenol | 4-ethenyl-2-methoxyphenol | leaf | 332 | COC1=C(C=CC(=C1)C=C)O |
| 21 | Nonanal | Nonanal | leaf | 31289 | CCCCCCCCC=O |
| 22 | Eugenol | 2-methoxy-4-prop-2-enylphenol | leaf | 3314 | COC1=C(C=CC(=C1)CC=C)O |
| 23 | Tetradecanal | Tetradecanal | leaf | 31291 | CCCCCCCCCCCCCC=O |
| 24 | 2,4-Decadienal | (2E,4E)-deca-2,4-dienal | leaf | 5283349 | CCCCC/C=C/C=C/C=O |
| 25 | Taxiphyllin | (2R)-2-(4-hydroxyphenyl)-2-[(2R,3R,4S,5S,6R)-3,4,5-trihydroxy-6-(hydroxymethyl)oxan-2-yl]oxyacetonitrile | leaf | 107721 | C1=CC(=CC=C1[C@H](C#N)O[C@H]2[C@@H]([C@H]([C@@H]([C@H](O2)CO)O)O)O)O |
| 26 | Ginkgetin | 5,7-dihydroxy-8-[5-(5-hydroxy-7-methoxy-4-oxochromen-2-yl)-2-methoxyphenyl]-2-(4-hydroxyphenyl)chromen-4-one | leaf | 5271805 | COC1=C(C=C(C=C1)C2=CC(=O)C3=C(C=C(C=C3O2)OC)O)C4=C(C=C(C5=C4OC(=CC5=O)C6=CC=C(C=C6)O)O)O |
| 27 | 1-Octen-3-OL | oct-1-en-3-ol | leaf | 18827 | CCCCCC(C=C)O |
| 28 | Sciadopitysin | 5,7-dihydroxy-8-[5-(5-hydroxy-7-methoxy-4-oxochromen-2-yl)-2-methoxyphenyl]-2-(4-methoxyphenyl)chromen-4-one | leaf | 5281696 | COC1=CC=C(C=C1)C2=CC(=O)C3=C(O2)C(=C(C=C3O)O)C4=C(C=CC(=C4)C5=CC(=O)C6=C(C=C(C=C6O5)OC)O)OC |
| 29 | 2-Undecenal | (E)-undec-2-enal | leaf | 5283356 | CCCCCCCC/C=C/C=O |
| 30 | 2,4-Heptadienal | (2E,4E)-hepta-2,4-dienal | leaf | 5283321 | CC/C=C/C=C/C=O |
| 31 | Amentoflavone | 8-[5-(5,7-dihydroxy-4-oxochromen-2-yl)-2-hydroxyphenyl]-5,7-dihydroxy-2-(4-hydroxyphenyl)chromen-4-one | leaf | 5281600 | C1=CC(=CC=C1C2=CC(=O)C3=C(O2)C(=C(C=C3O)O)C4=C(C=CC(=C4)C5=CC(=O)C6=C(C=C(C=C6O5)O)O)O)O |
| 32 | Sequoiaflavone | 5,7-dihydroxy-8-[2-hydroxy-5-(5-hydroxy-7-methoxy-4-oxochromen-2-yl)phenyl]-2-(4-hydroxyphenyl)chromen-4-one | leaf | 5484010 | COC1=CC(=C2C(=C1)OC(=CC2=O)C3=CC(=C(C=C3)O)C4=C(C=C(C5=C4OC(=CC5=O)C6=CC=C(C=C6)O)O)O)O |
| 33 | Sotetsuflavone | 8-[5-(5,7-dihydroxy-4-oxochromen-2-yl)-2-hydroxyphenyl]-5-hydroxy-2-(4-hydroxyphenyl)-7-methoxychromen-4-one | leaf | 5494868 | COC1=C(C2=C(C(=C1)O)C(=O)C=C(O2)C3=CC=C(C=C3)O)C4=C(C=CC(=C4)C5=CC(=O)C6=C(C=C(C=C6O5)O)O)O |
| 34 | 3,4-Dihydroxyphenylacetic acid | 2-(3,4-dihydroxyphenyl)acetic acid | leaf | 547 | C1=CC(=C(C=C1CC(=O)O)O)O |
| 35 | (-)-alpha-Conidendrin | (3aR,9R,9aS)-7-hydroxy-9-(4-hydroxy-3-methoxyphenyl)-6-methoxy-3a,4,9,9a-tetrahydro-1H-benzo[f][2]benzofuran-3-one | leaf | 72506 | COC1=C(C=C2[C@H]([C@@H]3COC(=O)[C@@H]3CC2=C1)C4=CC(=C(C=C4)O)OC)O |
| 36 | 3-Hydroxybenzoic acid | 3-Hydroxybenzoic acid | leaf | 7420 | C1=CC(=CC(=C1)O)C(=O)O |
| 37 | beta-Ionone | (E)-4-(2,6,6-trimethylcyclohexen-1-yl)but-3-en-2-one | leaf | 638014 | CC1=C(C(CCC1)(C)C)/C=C/C(=O)C |
| 38 | Isophorone | 3,5,5-trimethylcyclohex-2-en-1-one | leaf | 6544 | CC1=CC(=O)CC(C1)(C)C |
| 39 | Shikimic acid | (3R,4S,5R)-3,4,5-trihydroxycyclohexene-1-carboxylic acid | leaf | 8742 | C1[C@H]([C@@H]([C@@H](C=C1C(=O)O)O)O)O |
| 40 | Methyl palmitate | methyl hexadecanoate | leaf | 8181 | CCCCCCCCCCCCCCCC(=O)OC |
| 41 | Acetophenone | 1-phenylethanone | leaf | 7410 | CC(=O)C1=CC=CC=C1 |
| 42 | Vanillic acid | 4-hydroxy-3-methoxybenzoic acid | leaf | 8468 | COC1=C(C=CC(=C1)C(=O)O)O |
| 43 | Quinic acid | trans-(3R,5R)-1,3,4,5-tetrahydroxycyclohexane-1-carboxylic acid | leaf | 6508 | C1[C@H](C([C@@H](CC1(C(=O)O)O)O)O)O |
| 44 | 1-Hexanol | hexan-1-ol | leaf | 8103 | CCCCCCO |
| 45 | Taxicatin | (2S,3R,4S,5S,6R)-2-(3,5-dimethoxyphenoxy)-6-(hydroxymethyl)oxane-3,4,5-triol | leaf | 90479391 | COC1=CC(=CC(=C1)O[C@H]2[C@@H]([C@H]([C@@H]([C@H](O2)CO)O)O)O)OC |
| 46 | Palmitic acid | hexadecanoic acid | leaf | 985 | CCCCCCCCCCCCCCCC(=O)O |
| 47 | Hexadecanal | hexadecanal | leaf | 984 | CCCCCCCCCCCCCCCC=O |
| 48 | Phenylacetaldehyde | 2-phenylacetaldehyde | leaf | 998 | C1=CC=C(C=C1)CC=O |
| 49 | 8-[5-(5,7-Dihydroxy-4-oxochromen-2-yl)-2-methoxyphenyl]-5-hydroxy-7-methoxy-2-(4-methoxyphenyl)chromen-4-one | 8-[5-(5,7-dihydroxy-4-oxochromen-2-yl)-2-methoxyphenyl]-5-hydroxy-7-methoxy-2-(4-methoxyphenyl)chromen-4-one | leaf | 9894522 | COC1=CC=C(C=C1)C2=CC(=O)C3=C(O2)C(=C(C=C3O)OC)C4=C(C=CC(=C4)C5=CC(=O)C6=C(C=C(C=C6O5)O)O)OC |
| 50 | 1-Octanol | octan-1-ol | leaf | 957 | CCCCCCCCO |
| 51 | 4-Vinylphenol | 4-ethenylphenol | leaf | 62453 | C=CC1=CC=C(C=C1)O |
| 52 | Podocarpusflavone A | 8-[5-(5,7-dihydroxy-4-oxochromen-2-yl)-2-hydroxyphenyl]-5,7-dihydroxy-2-(4-methoxyphenyl)chromen-4-one | leaf | 5320644 | COC1=CC=C(C=C1)C2=CC(=O)C3=C(O2)C(=C(C=C3O)O)C4=C(C=CC(=C4)C5=CC(=O)C6=C(C=C(C=C6O5)O)O)O |
| 53 | 4-Hydroxybenzaldehyde | 4-hydroxybenzaldehyde | leaf | 126 | C1=CC(=CC=C1C=O)O |
| 54 | Heptadecane | heptadecane | leaf | 12398 | CCCCCCCCCCCCCCCCC |
| 55 | Pentadecane | pentadecane | leaf | 12391 | CCCCCCCCCCCCCCC |
| 56 | Benzaldehyde | benzaldehyde | leaf | 240 | C1=CC=C(C=C1)C=O |
| 57 | 4-Hydroxybenzoic acid | 4-hydroxybenzoic acid | leaf | 135 | C1=CC(=CC=C1C(=O)O)O |
| 58 | Rhododendrin | (2R,3S,4S,5R,6R)-2-(hydroxymethyl)-6-[(2R)-4-(4-hydroxyphenyl)butan-2-yl]oxyoxane-3,4,5-triol | leaf | 442538 | C[C@H](CCC1=CC=C(C=C1)O)O[C@H]2[C@@H]([C@H]([C@@H]([C@H](O2)CO)O)O)O |
| 59 | Abietatriene | (4aS,10aS)-1,1,4a-trimethyl-7-propan-2-yl-2,3,4,9,10,10a-hexahydrophenanthrene | leaf | 6432211 | CC(C)C1=CC2=C(C=C1)[C@]3(CCCC([C@@H]3CC2)(C)C)C |
| 60 | Salicylic acid | 2-hydroxybenzoic acid | leaf | 338 | C1=CC=C(C(=C1)C(=O)O)O |
| 61 | 2,3-Dihydroxybenzoic acid | 2,3-dihydroxybenzoic acid | leaf | 19 | C1=CC(=C(C(=C1)O)O)C(=O)O |
| 62 | cis-3-Hexen-1-ol | (Z)-hex-3-en-1-ol | leaf | 5281167 | CC/C=C\CCO |
| 63 | Ephedrine | (1R,2S)-2-(methylamino)-1-phenylpropan-1-ol | leaf | 9294 | C[C@@H]([C@@H](C1=CC=CC=C1)O)NC |
| 64 | Ferulic acid | (E)-3-(4-hydroxy-3-methoxyphenyl)prop-2-enoic acid | leaf | 445858 | COC1=C(C=CC(=C1)/C=C/C(=O)O)O |
| 65 | 3,4-Dihydroxybenzoic acid | 3,4-dihydroxybenzoic acid | leaf | 72 | C1=CC(=C(C=C1C(=O)O)O)O |
| 66 | (Z)-Ethyl cinnamate | ethyl (Z)-3-phenylprop-2-enoate | leaf | 5284656 | CCOC(=O)/C=C\C1=CC=CC=C1 |
| 67 | Caffeic acid | (E)-3-(3,4-dihydroxyphenyl)prop-2-enoic acid | leaf | 689043 | C1=CC(=C(C=C1/C=C/C(=O)O)O)O |
| 68 | Cinnamic acid | (E)-3-phenylprop-2-enoic acid | leaf | 444539 | C1=CC=C(C=C1)/C=C/C(=O)O |
| 69 | 4-Hydroxycinnamic acid | (E)-3-(4-hydroxyphenyl)prop-2-enoic acid | leaf | 637542 | C1=CC(=CC=C1/C=C/C(=O)O)O |
| 70 | Gallic acid | 3,4,5-trihydroxybenzoic acid | leaf | 370 | C1=C(C=C(C(=C1O)O)O)C(=O)O |
| 71 | Isopropyl myristate | propan-2-yl tetradecanoate | leaf | 8042 | CCCCCCCCCCCCCC(=O)OC(C)C |
| 72 | alpha-Terpineol | 2-(4-methylcyclohex-3-en-1-yl)propan-2-ol | leaf | 17100 | CC1=CCC(CC1)C(C)(C)O |
| 73 | Phytol | (E,7R,11R)-3,7,11,15-tetramethylhexadec-2-en-1-ol | leaf | 5280435 | C[C@@H](CCC[C@@H](C)CCC/C(=C/CO)/C)CCCC(C)C |
| 74 | Taxine A | [(1R,2S,3E,5S,7S,8S,10R,13S)-2,13-diacetyloxy-7,10-dihydroxy-8,12,15,15-tetramethyl-9-oxo-5-tricyclo[9.3.1.14,8]hexadeca-3,11-dienyl] (2R,3S)-3-(dimethylamino)-2-hydroxy-3-phenylpropanoate | leaf | 5281829 | CC1=C2[C@H](C(=O)[C@]3(C/C(=C\[C@@H]([C@@H](C2(C)C)C[C@@H]1OC(=O)C)OC(=O)C)/[C@H](C[C@@H]3O)OC(=O)[C@@H]([C@H](C4=CC=CC=C4)N(C)C)O)C)O |
| 75 | 20-Hydroxyecdysone | (2S,3R,5R,9R,10R,13R,14S,17S)-2,3,14-trihydroxy-10,13-dimethyl-17-[(2R,3R)-2,3,6-trihydroxy-6-methylheptan-2-yl]-2,3,4,5,9,11,12,15,16,17-decahydro-1H-cyclopenta[a]phenanthren-6-one | leaf | 5459840 | C[C@]12CC[C@H]3C(=CC(=O)[C@H]4[C@@]3(C[C@@H]([C@@H](C4)O)O)C)[C@@]1(CC[C@@H]2[C@](C)([C@@H](CCC(C)(C)O)O)O)O |
| 76 | Hydroxymatairesinol | (3R,4R)-4-[(S)-hydroxy-(4-hydroxy-3-methoxyphenyl)methyl]-3-[(4-hydroxy-3-methoxyphenyl)methyl]oxolan-2-one | leaf | 10948757 | COC1=C(C=CC(=C1)C[C@@H]2[C@H](COC2=O)[C@@H](C3=CC(=C(C=C3)O)OC)O)O |
| 77 | 4-Hydroxyphenylacetic acid | 2-(4-hydroxyphenyl)acetic acid | leaf | 127 | C1=CC(=CC=C1CC(=O)O)O |
| 78 | 2,4,6-Trihydroxybenzoic acid | 2,4,6-trihydroxybenzoic acid | leaf | 66520 | C1=C(C=C(C(=C1O)C(=O)O)O)O |
| 79 | Di-O-methylamentoflavone | 8-[5-(5,7-dihydroxy-4-oxochromen-2-yl)-2-hydroxyphenyl]-5-hydroxy-7-methoxy-2-(4-methoxyphenyl)chromen-4-one | leaf | 5491518 | COC1=CC=C(C=C1)C2=CC(=O)C3=C(O2)C(=C(C=C3O)OC)C4=C(C=CC(=C4)C5=CC(=O)C6=C(C=C(C=C6O5)O)O)O |
| 80 | 2-Deacetyltaxine A | [(1S,3Z,5S,7S,10S,13R)-13-acetyloxy-2,7,10-trihydroxy-8,12,15,15-tetramethyl-9-oxo-5-tricyclo[9.3.1.14,8]hexadeca-3,11-dienyl] (2S,3R)-3-(dimethylamino)-2-hydroxy-3-phenylpropanoate | leaf | 101676778 | CC1=C2[C@@H](C(=O)C3(C/C(=C/C([C@H](C2(C)C)C[C@H]1OC(=O)C)O)/[C@H](C[C@@H]3O)OC(=O)[C@H]([C@@H](C4=CC=CC=C4)N(C)C)O)C)O |
| 81 | Geraniol | (2E)-3,7-dimethylocta-2,6-dien-1-ol | leaf | 637566 | CC(=CCC/C(=C/CO)/C)C |
| 82 | 3,5-Dimethoxyphenol | 3,5-dimethoxyphenol | leaf | 10383 | COC1=CC(=CC(=C1)O)OC |
| 83 | Taxusin | [(1R,3R,5S,8R,9R,10R,13S)-9,10,13-triacetyloxy-8,12,15,15-tetramethyl-4-methylidene-5-tricyclo[9.3.1.03,8]pentadec-11-enyl] acetate | root | 167825 | CC1=C2[C@H]([C@@H]([C@@]3(CC[C@@H](C(=C)[C@H]3C[C@@H](C2(C)C)C[C@@H]1OC(=O)C)OC(=O)C)C)OC(=O)C)OC(=O)C |
| 84 | (2Z,4E)-5-[(1S)-1-hydroxy-2,6,6-trimethyl-4-oxocyclohex-2-en-1-yl]-3-methylpenta-2,4-dienoic acid | (2Z,4E)-5-[(1S)-1-hydroxy-2,6,6-trimethyl-4-oxocyclohex-2-en-1-yl]-3-methylpenta-2,4-dienoic acid | seed | 5280896 | CC1=CC(=O)CC([C@]1(/C=C/C(=C\C(=O)O)/C)O)(C)C |
| 85 | Taxchinin A | [(2S,4R,5R,5aS,6S,8S,9aR,10S,10aS)-5,6,10-triacetyloxy-2,8-dihydroxy-10a-(2-hydroxypropan-2-yl)-3,5a-dimethyl-9-methylidene-2,4,5,6,7,8,9a,10-octahydro-1H-benzo[g]azulen-4-yl] benzoate | seed | 5319881 | CC1=C2[C@H]([C@@H]([C@@]3([C@H](C[C@@H](C(=C)[C@H]3[C@@H]([C@@]2(C[C@@H]1O)C(C)(C)O)OC(=O)C)O)OC(=O)C)C)OC(=O)C)OC(=O)C4=CC=CC=C4 |
| 86 | 2alpha-Deacetyltaxinine | [(1R,2R,3R,5S,7S,8S,9R,10R,13S)-7,9,10,13-tetraacetyloxy-2-hydroxy-8,12,15,15-tetramethyl-4-methylidene-5-tricyclo[9.3.1.03,8]pentadec-11-enyl] (E)-3-phenylprop-2-enoate | whole plant | 44316906 | CC1=C2[C@H]([C@@H]([C@@]3([C@H](C[C@@H](C(=C)[C@H]3[C@@H]([C@@H](C2(C)C)C[C@@H]1OC(=O)C)O)OC(=O)/C=C/C4=CC=CC=C4)OC(=O)C)C)OC(=O)C)OC(=O)C |
| 87 | Baccatin IV | [(1S,2S,3R,4S,7R,9S,10S,11R,12R,15S)-2,4,11,12,15-pentaacetyloxy-1-hydroxy-10,14,17,17-tetramethyl-6-oxatetracyclo[11.3.1.03,10.04,7]heptadec-13-en-9-yl] acetate | whole plant | 15275710 | CC1=C2[C@H]([C@@H]([C@@]3([C@H](C[C@@H]4[C@]([C@H]3[C@@H]([C@@](C2(C)C)(C[C@@H]1OC(=O)C)O)OC(=O)C)(CO4)OC(=O)C)OC(=O)C)C)OC(=O)C)OC(=O)C |
| 88 | Taxagifin | [(1R,2R,3S,4R,5S,6S,8S,10S,11R,12R,15S)-3,4,6,11-tetraacetyloxy-2-hydroxy-1,5,15-trimethyl-9-methylidene-14-oxo-16-oxatetracyclo[10.5.0.02,15.05,10]heptadecan-8-yl] (E)-3-phenylprop-2-enoate | whole plant | 15226198 | CC(=O)O[C@H]1C[C@@H](C(=C)[C@H]2[C@@]1([C@H]([C@@H]([C@@]3([C@]4(CO[C@@]3(C(=O)C[C@H]4[C@H]2OC(=O)C)C)C)O)OC(=O)C)OC(=O)C)C)OC(=O)/C=C/C5=CC=CC=C5 |
| 89 | 1-Hydroxybaccatin I | [(1'S,2R,2'S,3'R,5'S,7'S,8'S,9'R,10'R,13'S)-2',5',9',10',13'-pentaacetyloxy-1'-hydroxy-8',12',15',15'-tetramethylspiro[oxirane-2,4'-tricyclo[9.3.1.03,8]pentadec-11-ene]-7'-yl] acetate | whole plant | 14466616 | CC1=C2[C@H]([C@@H]([C@@]3([C@H](C[C@@H]([C@@]4([C@H]3[C@@H]([C@@](C2(C)C)(C[C@@H]1OC(=O)C)O)OC(=O)C)CO4)OC(=O)C)OC(=O)C)C)OC(=O)C)OC(=O)C |
| 90 | Taxamairin C | (1R,10R,12S)-3,12-dihydroxy-4-methoxy-11,11-dimethyl-5-propan-2-yl-13-oxatetracyclo[10.2.2.01,10.02,7]hexadeca-2,4,6-trien-8-one | whole plant | 101335609 | CC(C)C1=C(C(=C2C(=C1)C(=O)C[C@@H]3[C@]24CC[C@@](C3(C)C)(OC4)O)O)OC |
| 91 | 19-Hydroxybaccatin III | [(1S,2S,3R,4S,7R,9S,10R,12R,15S)-4,12-diacetyloxy-1,9,15-trihydroxy-10-(hydroxymethyl)-14,17,17-trimethyl-11-oxo-6-oxatetracyclo[11.3.1.03,10.04,7]heptadec-13-en-2-yl] benzoate | whole plant | 5318151 | CC1=C2[C@H](C(=O)[C@@]3([C@H](C[C@@H]4[C@]([C@H]3[C@@H]([C@@](C2(C)C)(C[C@@H]1O)O)OC(=O)C5=CC=CC=C5)(CO4)OC(=O)C)O)CO)OC(=O)C |
| 92 | 5-Acetylbrevifoliol | [(2S,4R,5R,5aS,6S,8S,9aR,10aS)-5,6,8-triacetyloxy-2-hydroxy-10a-(2-hydroxypropan-2-yl)-3,5a-dimethyl-9-methylidene-2,4,5,6,7,8,9a,10-octahydro-1H-benzo[g]azulen-4-yl] benzoate | whole plant | 21578947 | CC1=C2[C@H]([C@@H]([C@@]3([C@H](C[C@@H](C(=C)[C@H]3C[C@@]2(C[C@@H]1O)C(C)(C)O)OC(=O)C)OC(=O)C)C)OC(=O)C)OC(=O)C4=CC=CC=C4 |
| 93 | Taxusabietane A | (4aS,10aR)-5-hydroxy-6-methoxy-1,1,4a-trimethyl-7-propan-2-yl-3,4,10,10a-tetrahydrophenanthrene-2,9-dione | whole plant | 76330776 | CC(C)C1=C(C(=C2C(=C1)C(=O)C[C@@H]3[C@@]2(CCC(=O)C3(C)C)C)O)OC |
| 94 | Baccatin III | [(1S,2S,3R,4S,7R,9S,10S,12R,15S)-4,12-diacetyloxy-1,9,15-trihydroxy-10,14,17,17-tetramethyl-11-oxo-6-oxatetracyclo[11.3.1.03,10.04,7]heptadec-13-en-2-yl] benzoate | whole plant | 65366 | CC1=C2[C@H](C(=O)[C@@]3([C@H](C[C@@H]4[C@]([C@H]3[C@@H]([C@@](C2(C)C)(C[C@@H]1O)O)OC(=O)C5=CC=CC=C5)(CO4)OC(=O)C)O)C)OC(=O)C |
| 95 | Taxiresinol | 4-[(2S,3R,4R)-4-[(4-hydroxy-3-methoxyphenyl)methyl]-3-(hydroxymethyl)oxolan-2-yl]benzene-1,2-diol | wood | 10088963 | COC1=C(C=CC(=C1)C[C@H]2CO[C@@H]([C@H]2CO)C3=CC(=C(C=C3)O)O)O |
| 96 | Secoisolariciresinol | (2R,3R)-2,3-bis[(4-hydroxy-3-methoxyphenyl)methyl]butane-1,4-diol | wood | 65373 | COC1=C(C=CC(=C1)C[C@@H](CO)[C@@H](CC2=CC(=C(C=C2)O)OC)CO)O |
| 97 | 4-Hydroxy-3-methoxycinnamaldehyde | (E)-3-(4-hydroxy-3-methoxyphenyl)prop-2-enal | wood | 5280536 | COC1=C(C=CC(=C1)/C=C/C=O)O |
| 98 | Isotaxiresinol | 4-[(1S,2R,3R)-7-hydroxy-2,3-bis(hydroxymethyl)-6-methoxy-1,2,3,4-tetrahydronaphthalen-1-yl]benzene-1,2-diol | wood | 9841162 | COC1=C(C=C2[C@@H]([C@H]([C@@H](CC2=C1)CO)CO)C3=CC(=C(C=C3)O)O)O |

| S**upplementary Table 2:**  Ramachandran quality parameters for 4MI5 | | | |
| --- | --- | --- | --- |
| **Servers** | **Residues in favored region (%)** | **Residues in allowed region (%)** | **Residues in disallowed region** |
| PROCHECK | 82.0% | 17.5% | 1 |
| Molprobity | 95.1% | 99.5% | 1 |

| | **Supplementary Table 3:** Binding affinities of *Taxus baccata-*derived phytochemicals | | | | | --- | --- | --- | --- | | **Serial no.** | **Name** | **CID** | Docking score (kcal/mol) | |  | Sotetsuflavone | 5494868 | -10.4 | |  | Ginkgetin | 5271805 | -9.9 | |  | Amentoflavone | 5281600 | -9.7 | |  | Podocarpusflavone A | 5320644 | -9.7 | |  | Sequoiaflavone | 5484010 | -9.2 | |  | Di-O-methylamentoflavone | 5491518 | -9.2 | |  | Eschscholtzxanthone | 16061205 | -8.6 | |  | 8-[5-(5,7-Dihydroxy-4-oxochromen-2-yl)-2-methoxyphenyl]-5-hydroxy-7-methoxy-2-(4-methoxyphenyl)chromen-4-one | 9894522 | -8.6 | |  | Rhodoxanthin | 5281251 | -8.4 | |  | Sciadopitysin | 5281696 | -8.2 | |  | beta-Carotene | 5280489 | -8 | |  | Taxinine | 10054413 | -7.9 | |  | Zeaxanthin | 5280899 | -7.9 | |  | 5-Acetylbrevifoliol | 21578947 | -7.6 | |  | Baccatin III | 65366 | -7.6 | |  | Abietatriene | 6432211 | -7.5 | |  | Taxchinin A | 5319881 | -7.5 | |  | 10-Deacetylbaccatin III | 154272 | -7.5 | |  | Taxiphyllin | 107721 | -7.5 | |  | beta-Sitosterol | 222284 | -7.4 | |  | 2alpha-Deacetyltaxinine | 44316906 | -7.3 | |  | 20-Hydroxyecdysone | 5459840 | -7.3 | |  | Taxine A | 5281829 | -7.3 | |  | 2-Deacetyltaxine A | 101676778 | -7.2 | |  | Taxiresinol | 10088963 | -7.2 | |  | (-)-alpha-Conidendrin | 72506 | -7.2 | |  | Hydroxymatairesinol | 10948757 | -7 | |  | 19-Hydroxybaccatin III | 5318151 | -6.9 | |  | Ferruginol | 442027 | -6.9 | |  | Taxagifin | 15226198 | -6.6 | |  | Rhododendrin | 442538 | -6.6 | |  | Taxicatin | 90479391 | -6.5 | |  | Taxamairin C | 101335609 | -6.4 | |  | Isotaxiresinol | 9841162 | -6.4 | |  | Secoisolariciresinol | 65373 | -6.3 | |  | Taxusabietane A | 76330776 | -6.2 | |  | 3,4-Dihydroxyphenylacetic acid | 547 | -6.1 | |  | Teixidol | 101997932 | -6 | |  | Caffeic acid | 689043 | -6 | |  | Taxusin | 167825 | -6 | |  | 2,4,6-Trihydroxybenzoic acid | 66520 | -6 | |  | 2,3-Dihydroxybenzoic acid | 19 | -6 | |  | Ferulic acid | 445858 | -5.9 | |  | Lignan | 261166 | -5.9 | |  | alpha-Terpineol | 17100 | -5.9 | |  | Gallic acid | 370 | -5.9 | |  | beta-Ionone | 638014 | -5.8 | |  | Vanillic acid | 8468 | -5.8 | |  | 2,5-Dihydroxybenzoic acid | 3469 | -5.8 | |  | Salicylic acid | 338 | -5.8 | |  | (2Z,4E)-5-[(1S)-1-hydroxy-2,6,6-trimethyl-4-oxocyclohex-2-en-1-yl]-3-methylpenta-2,4-dienoic acid | 5280896 | -5.7 | |  | 4-Hydroxy-3-methoxycinnamaldehyde | 5280536 | -5.7 | |  | 4-Hydroxycinnamic acid | 637542 | -5.7 | |  | Syringic acid | 10742 | -5.7 | |  | Isophytol | 10453 | -5.7 | |  | Eugenol | 3314 | -5.7 | |  | 3,4-Dihydroxybenzoic acid | 72 | -5.7 | |  | 1-Hydroxybaccatin I | 14466616 | -5.6 | |  | Phytol | 5280435 | -5.6 | |  | Cinnamic acid | 444539 | -5.6 | |  | Quinic acid | 6508 | -5.6 | |  | 2-Methoxy-4-vinylphenol | 332 | -5.6 | |  | 4-Hydroxyphenylacetic acid | 127 | -5.6 | |  | 4-Vinylphenol | 62453 | -5.5 | |  | 6,10,14-Trimethylpentadecan-2-one | 10408 | -5.5 | |  | 3-Hydroxybenzoic acid | 7420 | -5.5 | |  | Acetophenone | 7410 | -5.5 | |  | Shikimic acid | 8742 | -5.4 | |  | Baccatin IV | 15275710 | -5.3 | |  | (Z)-Ethyl cinnamate | 5284656 | -5.2 | |  | Methyl palmitate | 8181 | -5.2 | |  | Phenylacetaldehyde | 998 | -5.2 | |  | Benzoic acid | 243 | -5.2 | |  | 4-Hydroxybenzoic acid | 135 | -5.2 | |  | 2,4-Decadienal | 5283349 | -5.1 | |  | 3,5-Dimethoxyphenol | 10383 | -5.1 | |  | Ephedrine | 9294 | -5.1 | |  | Palmitic acid | 985 | -5.1 | |  | 4-Hydroxybenzaldehyde | 126 | -5.1 | |  | Geraniol | 637566 | -5 | |  | Pentadecane | 12391 | -5 | |  | Octadecane | 11635 | -5 | |  | Benzaldehyde | 240 | -5 | |  | 2-Undecenal | 5283356 | -4.9 | |  | Myristic acid | 11005 | -4.9 | |  | Hexadecanal | 984 | -4.9 | |  | Pentadecanal | 17697 | -4.8 | |  | Heptadecane | 12398 | -4.8 | |  | Isophorone | 6544 | -4.8 | |  | Isopropyl myristate | 8042 | -4.7 | |  | 2,4-Heptadienal | 5283321 | -4.6 | |  | Tetradecanal | 31291 | -4.6 | |  | Nonanal | 31289 | -4.6 | |  | Myrtenol | 10582 | -4.6 | |  | 1-Octanol | 957 | -4.4 | |  | 1-Octen-3-OL | 18827 | -4.3 | |  | cis-3-Hexen-1-ol | 5281167 | -4.2 | |  | 1-Hexanol | 8103 | -4.1 | |
| --- | --- | --- | --- | --- | --- | --- | --- | --- | --- | --- | --- | --- | --- | --- | --- | --- | --- | --- | --- | --- | --- | --- | --- | --- | --- | --- | --- | --- | --- | --- | --- | --- | --- | --- | --- | --- | --- | --- | --- | --- | --- | --- | --- | --- | --- | --- | --- | --- | --- | --- | --- | --- | --- | --- | --- | --- | --- | --- | --- | --- | --- | --- | --- | --- | --- | --- | --- | --- | --- | --- | --- | --- | --- | --- | --- | --- | --- | --- | --- | --- | --- | --- | --- | --- | --- | --- | --- | --- | --- | --- | --- | --- | --- | --- | --- | --- | --- | --- | --- | --- | --- | --- | --- | --- | --- | --- | --- | --- | --- | --- | --- | --- | --- | --- | --- | --- | --- | --- | --- | --- | --- | --- | --- | --- | --- | --- | --- | --- | --- | --- | --- | --- | --- | --- | --- | --- | --- | --- | --- | --- | --- | --- | --- | --- | --- | --- | --- | --- | --- | --- | --- | --- | --- | --- | --- | --- | --- | --- | --- | --- | --- | --- | --- | --- | --- | --- | --- | --- | --- | --- | --- | --- | --- | --- | --- | --- | --- | --- | --- | --- | --- | --- | --- | --- | --- | --- | --- | --- | --- | --- | --- | --- | --- | --- | --- | --- | --- | --- | --- | --- | --- | --- | --- | --- | --- | --- | --- | --- | --- | --- | --- | --- | --- | --- | --- | --- | --- | --- | --- | --- | --- | --- | --- | --- | --- | --- | --- | --- | --- | --- | --- | --- | --- | --- | --- | --- | --- | --- | --- | --- | --- | --- | --- | --- | --- | --- | --- | --- | --- | --- | --- | --- | --- | --- | --- | --- | --- | --- | --- | --- | --- | --- | --- | --- | --- | --- | --- | --- | --- | --- | --- | --- | --- | --- | --- | --- | --- | --- | --- | --- | --- | --- | --- | --- | --- | --- | --- | --- | --- | --- | --- | --- | --- | --- | --- | --- | --- | --- | --- | --- | --- | --- | --- | --- | --- | --- | --- | --- | --- | --- | --- | --- | --- | --- | --- | --- | --- | --- | --- | --- | --- | --- | --- | --- | --- | --- | --- | --- | --- | --- | --- | --- | --- | --- | --- | --- | --- | --- | --- | --- | --- | --- | --- | --- | --- | --- | --- | --- | --- | --- | --- | --- | --- | --- | --- | --- | --- | --- | --- | --- | --- | --- | --- | --- | --- | --- | --- | --- | --- | --- | --- | --- | --- | --- | --- | --- | --- | --- | --- | --- | --- | --- | --- | --- | --- | --- | --- | --- | --- | --- | --- | --- | --- | --- | --- | --- | --- | --- | --- | --- |

| **Supplementary Table 4:**  Non-Bond interactions of selected ligands and the controls | | | | | |
| --- | --- | --- | --- | --- | --- |
| Serial | Ligand name | Residue | Distance (Å) | Category | Type |
| 01 | Sotetsuflavone (CID: 5494868) | SER524 | 2.19602 | Hydrogen Bond | Conventional Hydrogen Bond |
| ASN675 | 2.55394 | Hydrogen Bond | Conventional Hydrogen Bond |
| GLN735 | 2.40607 | Hydrogen Bond | Conventional Hydrogen Bond |
| ASN546 | 2.70507 | Hydrogen Bond | Conventional Hydrogen Bond |
| GLN526 | 2.61111 | Hydrogen Bond | Conventional Hydrogen Bond |
| ALA581 | 1.8672 | Hydrogen Bond | Conventional Hydrogen Bond |
| LEU525 | 2.74385 | Hydrogen Bond | Pi-Donor Hydrogen Bond |
| SER524 | 3.91585 | Hydrophobic | Pi-Sigma |
| MET706 | 3.93962 | Hydrophobic | Pi-Sigma |
| PHE678 | 5.25294 | Hydrophobic | Pi-Pi Stacked |
| PHE678 | 3.8205 | Hydrophobic | Pi-Pi Stacked |
| HIS711 | 4.76113 | Hydrophobic | Pi-Pi T-shaped |
| HIS711 | 4.59666 | Hydrophobic | Pi-Pi T-shaped |
| VAL704 | 4.92564 | Hydrophobic | Pi-Alkyl |
| VAL704 | 4.76412 | Hydrophobic | Pi-Alkyl |
| VAL704 | 2.98628 | Hydrogen Bond | Conventional Hydrogen Bond |
| 02 | Ginkgetin (CID: 5271805) | SER524 | 2.31629 | Hydrogen Bond | Conventional Hydrogen Bond |
| ASN546 | 2.03196 | Hydrogen Bond | Conventional Hydrogen Bond |
| ASN675 | 2.3671 | Hydrogen Bond | Conventional Hydrogen Bond |
| GLN735 | 2.81769 | Hydrogen Bond | Conventional Hydrogen Bond |
| ALA581 | 2.42721 | Hydrogen Bond | Conventional Hydrogen Bond |
| PHE547 | 2.29238 | Hydrogen Bond | Conventional Hydrogen Bond |
| LEU525 | 2.76173 | Hydrogen Bond | Pi-Donor Hydrogen Bond |
| SER524 | 3.86153 | Hydrophobic | Pi-Sigma |
| PHE678 | 5.33943 | Hydrophobic | Pi-Pi Stacked |
| PHE678 | 3.88901 | Hydrophobic | Pi-Pi Stacked |
| HIS711 | 4.72595 | Hydrophobic | Pi-Pi T-shaped |
| VAL704 | 5.1912 | Hydrophobic | Pi-Alkyl |
| VAL704 | 4.58496 | Hydrophobic | Pi-Alkyl |
| MET706 | 4.78652 | Hydrophobic | Pi-Alkyl |
| 03 | Amentoflavone (CID: 5281600) | VAL704 | 2.98628 | Hydrogen Bond | Conventional Hydrogen Bond |
| ALA581 | 1.83418 | Hydrogen Bond | Conventional Hydrogen Bond |
| GLN526 | 2.42269 | Hydrogen Bond | Conventional Hydrogen Bond |
| SER524 | 3.72079 | Hydrogen Bond | Carbon Hydrogen Bond |
| VAL582 | 3.69523 | Hydrophobic | Pi-Sigma |
| HIS711 | 5.32852 | Hydrophobic | Pi-Pi T-shaped |
| MET706 | 4.62839 | Hydrophobic | Pi-Alkyl |
| VAL582 | 4.53083 | Hydrophobic | Pi-Alkyl |
| ALA581 | 3.99284 | Hydrophobic | Pi-Alkyl |
| 04 | Podocarpusflavone A (CID: 5320644) | VAL582 | 2.14774 | Hydrogen Bond | Conventional Hydrogen Bond |
| SER524 | 3.67546 | Hydrogen Bond | Carbon Hydrogen Bond |
| VAL582 | 3.70993 | Hydrophobic | Pi-Sigma |
| HIS711 | 5.3288 | Hydrophobic | Pi-Pi T-shaped |
| ALA581 | 3.61192 | Hydrophobic | Alkyl |
| PHE547 | 5.07027 | Hydrophobic | Pi-Alkyl |
| MET706 | 4.63216 | Hydrophobic | Pi-Alkyl |
| VAL582 | 4.54004 | Hydrophobic | Pi-Alkyl |
| ALA581 | 4.00348 | Hydrophobic | Pi-Alkyl |
| 05 | Tazemetostat (CID: 66558664) | LYS574 | 2.46752 | Hydrogen Bond | Conventional Hydrogen Bond |
| LYS574 | 2.93461 | Hydrogen Bond | Conventional Hydrogen Bond |
| ALA736 | 3.78588 | Hydrogen Bond | Carbon Hydrogen Bond |
| VAL582 | 3.83897 | Hydrophobic | Pi-Sigma |
| VAL582 | 3.60292 | Hydrophobic | Pi-Sigma |
| PHE678 | 3.79149 | Hydrophobic | Pi-Pi Stacked |
| HIS711 | 4.50051 | Hydrophobic | Pi-Pi T-shaped |
| LEU525 | 4.98034 | Hydrophobic | Alkyl |
| ILE650 | 5.04055 | Hydrophobic | Alkyl |
| LEU674 | 4.20864 | Hydrophobic | Alkyl |
| VAL704 | 3.58665 | Hydrophobic | Alkyl |
| MET706 | 4.59351 | Hydrophobic | Alkyl |
| PHE678 | 4.53471 | Hydrophobic | Pi-Alkyl |
| PHE678 | 4.44503 | Hydrophobic | Pi-Alkyl |
| HIS711 | 4.86798 | Hydrophobic | Pi-Alkyl |
| HIS711 | 4.9398 | Hydrophobic | Pi-Alkyl |
| VAL704 | 5.13419 | Hydrophobic | Pi-Alkyl |
| VAL582 | 5.21496 | Hydrophobic | Pi-Alkyl |
| VAL704 | 5.24101 | Hydrophobic | Pi-Alkyl |
| LYS703 | 4.9691 | Hydrophobic | Pi-Alkyl |
| 06 | GSK 126 (CID: 68210102) | HIS711 | 2.22832 | Hydrogen Bond | Conventional Hydrogen Bond |
| GLY648 | 2.36009 | Hydrogen Bond | Conventional Hydrogen Bond |
| ILE650 | 3.74879 | Hydrophobic | Pi-Sigma |
| LYS685 | 4.80612 | Hydrophobic | Alkyl |
| PHE678 | 5.27575 | Hydrophobic | Pi-Alkyl |
| ILE650 | 5.22798 | Hydrophobic | Pi-Alkyl |


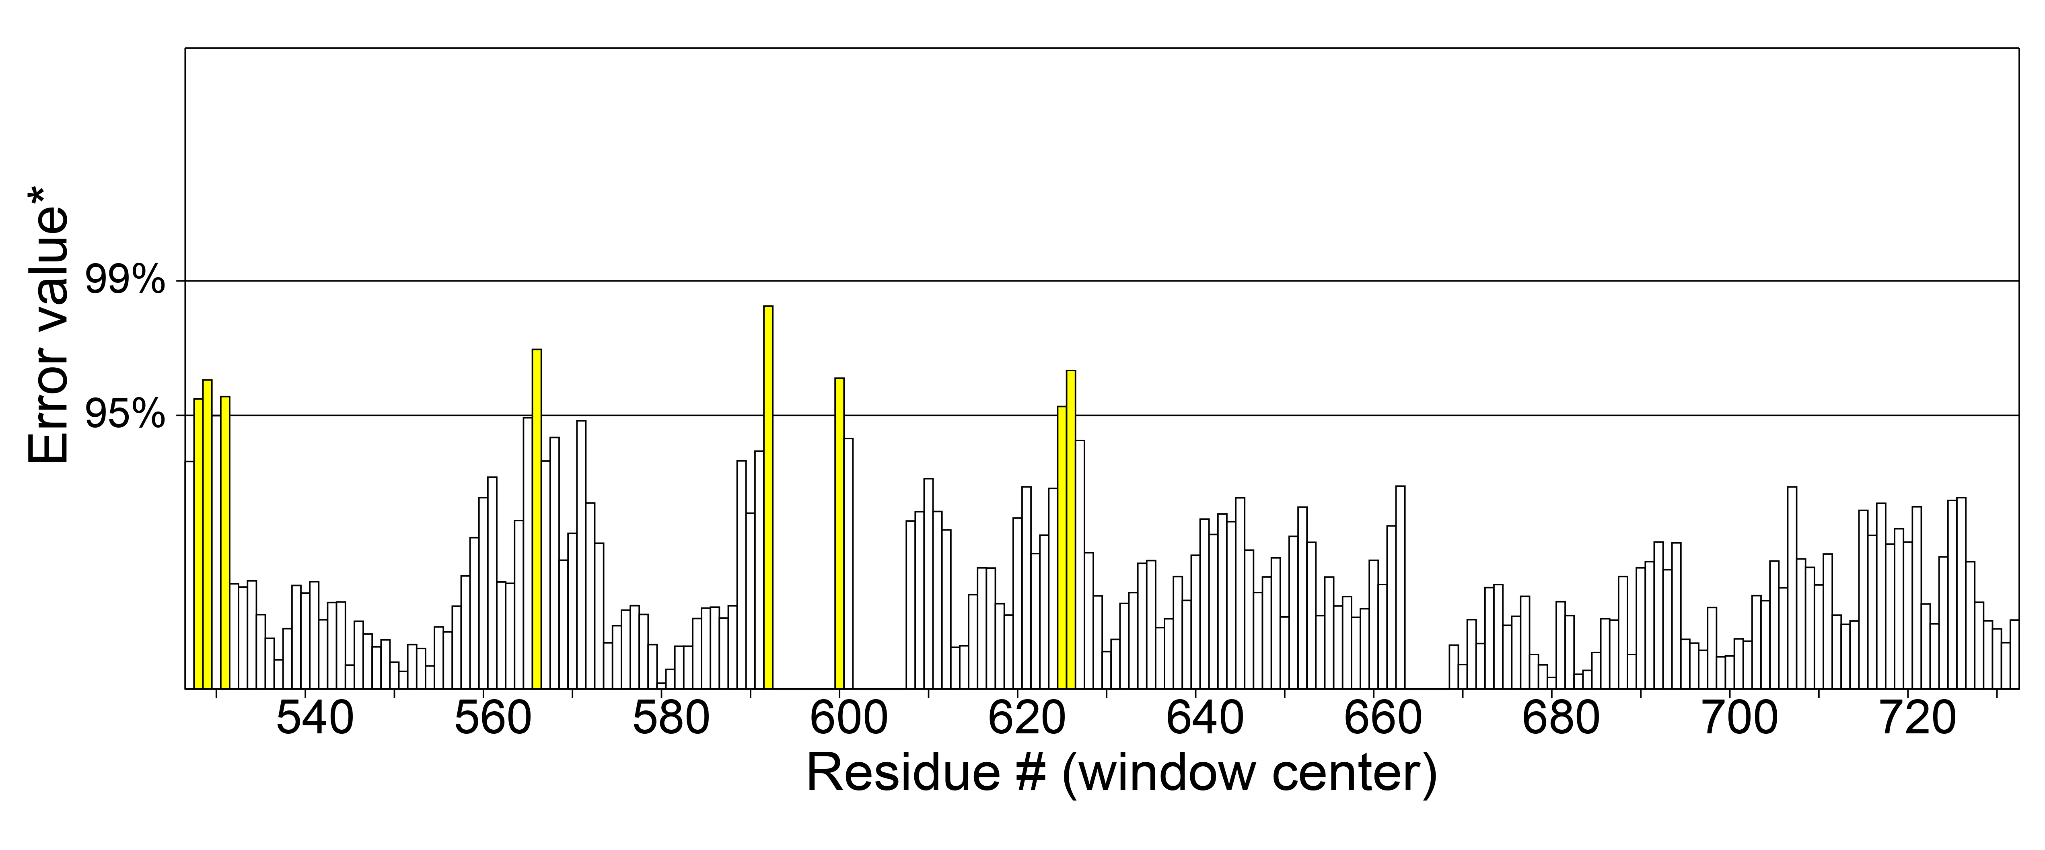


Figure 1Figure 1Histogram showing protein model validation errors. Yellow bars indicate outlier regions exceeding quality thresholds; white bars represent acceptable error levels within the structural validation range.
